# Supplementary material for: Chronic Encapsulated Intracerebral Hematoma as an Occasional Finding in Sudden Cardiac Death
Source: MDPI journal article supplement (doi:10.3390/healthcare10102053), 2022-10-17
Supplement: s1 [file s1]

| Authors & Years              | Age/ Sex | Presentation                                                   | Imaging Findings                                                      | Pathology                                                                       | Outcome           |
|------------------------------|----------|----------------------------------------------------------------|-----------------------------------------------------------------------|---------------------------------------------------------------------------------|-------------------|
| Avol & Vogel, 1955 [21]      | 48, M    | Headaches, nausea                                              | Hyperdensity                                                          | Well-circumscribed organized hematoma                                           | Complete recovery |
| Avol & Vogel, 1955 [21]      | 14, M    | Headaches, nausea, vomiting                                    | Hyperdensity                                                          | Well-organized and fibrotic blood clot, vascular malformation of choroid plexus | Complete recovery |
| Lin, et al., 1984 [22]       | 21, M    | Headache, vomiting, palsy of left abducens nerve               | Thin ring blush                                                       | Old and fresh hemorrhages                                                       | Complete recovery |
| Ooba, et al., 2003 [23]      | 68, F    | Gait disturbance, hemiparesis                                  | T1 isointense, T2 mixed intensity, heterogeneous contrast enhancement | Organized hematoma, granulomatous tissue                                        | Complete recovery |
| Kechagias, et al., 2010 [24] | 30, M    | Gait disturbance, fever, palsy of N. III, VI, VII, photophobia | High signal intensity on T1 and T2 weighted images                    | Granulation tissue, neovascularization                                          | Complete recovery |
| Dey, et al., 2011 [18]       | 47, F    | Apraxia, neglect                                               | Multilobulated lesions, calcifications and hemorrhage                 | Hematoma of different ages                                                      | Complete recovery |
| Wetzel, et al., 2018 [20]    | 14, M    | Headache, blurred vision, nausea, vomiting                     | Isodense mass with surrounding hyperdensity                           | Organized hematoma with fibroblasts                                             | Complete recovery |

**Table S1.** Summary of cases of CEIH with an intraventricular localization.
